# Supplementary material for: Reduction mechanism of iron titanium based oxygen carriers with H2for chemical looping applications – a combined experimental and theoretical study
Source: Royal Society of Chemistry journal article supplement (doi:10.1039/c6ra22922k), 2016-01-01
Supplement: c6ra22922k1.pdf [file c6ra22922k1.pdf]

**Supporting Information**

**Reduction mechanism of iron titanium based oxygen carriers with H<sub>2</sub> for**

**chemical looping applications- A combined experimental and theoretical study**

Yu-Cheng Liu,<sup>a,†</sup> Santhanamoorthi Nachimuthu,<sup>b,†</sup> Yu-Cheng Chuang,<sup>b</sup> Young Ku<sup>a,\*</sup> and Jyh-Chiang Jiang<sup>b,\*</sup>

<sup>a</sup> *Environmental Engineering Laboratory, Department of Chemical Engineering, National Taiwan University of Science and Technology, Taipei 10607, Taiwan, E-Mail: [ku508@mail.ntust.edu.tw](mailto:ku508@mail.ntust.edu.tw)*

<sup>b</sup> *Computational and Theoretical Chemistry Laboratory, Department of Chemical Engineering, National Taiwan University of Science and Technology, Taipei 10607, Taiwan, E-Mail: [jcjiang@mail.ntust.edu.tw](mailto:jcjiang@mail.ntust.edu.tw)*

---

<sup>†</sup> These authors contributed equally to this work

**Table S1.** Typical reaction conditions and results in case of Fe<sub>2</sub>TiO<sub>5</sub>.

| <b>Heating rate<br/>(°C/min)</b> | <b>Reaction<br/>Temperature<br/>(°C)</b> | <b>Holding time<br/>(hr)</b> | <b>Results</b>                                                                       |
|----------------------------------|------------------------------------------|------------------------------|--------------------------------------------------------------------------------------|
| 5                                | 600                                      | 2                            | TiO <sub>2</sub> , Fe <sub>2</sub> O <sub>3</sub>                                    |
| 5                                | 700                                      | 2                            | TiO <sub>2</sub> , Fe <sub>2</sub> O <sub>3</sub>                                    |
| 5                                | 800                                      | 2                            | TiO <sub>2</sub> , Fe <sub>2</sub> O <sub>3</sub>                                    |
| 5                                | 900                                      | 2                            | TiO <sub>2</sub> , Fe <sub>2</sub> O <sub>3</sub> , Fe <sub>2</sub> TiO <sub>5</sub> |
| 5                                | 1000                                     | 2                            | TiO <sub>2</sub> , Fe <sub>2</sub> O <sub>3</sub> , Fe <sub>2</sub> TiO <sub>5</sub> |
| 5                                | 1025                                     | 2                            | TiO <sub>2</sub> , Fe <sub>2</sub> O <sub>3</sub> , Fe <sub>2</sub> TiO <sub>5</sub> |
| 5                                | 1050                                     | 2                            | TiO <sub>2</sub> , Fe <sub>2</sub> O <sub>3</sub> , Fe <sub>2</sub> TiO <sub>5</sub> |
| 5                                | 1075                                     | 2                            | Fe <sub>2</sub> TiO <sub>5</sub>                                                     |

**Table S2.** Typical reaction conditions and results in case of Fe<sub>2</sub>TiO<sub>4</sub>.

| <b>Heating rate<br/>(°C/min)</b> | <b>Reaction<br/>Temperature<br/>(°C)</b> | <b>Holding time<br/>(hr)</b> | <b>Results</b>                                             |
|----------------------------------|------------------------------------------|------------------------------|------------------------------------------------------------|
| 5                                | 900                                      | 2                            | FeO, FeTiO <sub>3</sub> , Fe <sub>2</sub> TiO <sub>4</sub> |
| 5                                | 1000                                     | 2                            | FeO, FeTiO <sub>3</sub> , Fe <sub>2</sub> TiO <sub>4</sub> |
| 5                                | 1100                                     | 2                            | FeO, FeTiO <sub>3</sub> , Fe <sub>2</sub> TiO <sub>4</sub> |
| 5                                | 1200                                     | 2                            | FeO, FeTiO <sub>3</sub> , Fe <sub>2</sub> TiO <sub>4</sub> |
| 5                                | 1300                                     | 2                            | FeO, FeTiO <sub>3</sub> , Fe <sub>2</sub> TiO <sub>4</sub> |
| 5                                | 1300                                     | 5                            | FeO, FeTiO <sub>3</sub> , Fe <sub>2</sub> TiO <sub>4</sub> |
| 5                                | 1325                                     | 2                            | FeO, FeTiO <sub>3</sub> , Fe <sub>2</sub> TiO <sub>4</sub> |
| 5                                | 1325                                     | 5                            | Fe <sub>2</sub> TiO <sub>4</sub>                           |

**Table S3.** Typical reaction conditions and results in case of FeTiO<sub>3</sub>.

| <b>Heating rate<br/>(°C/min)</b> | <b>Reaction<br/>Temperature<br/>(°C)</b> | <b>Holding time<br/>(hr)</b> | <b>Results</b>                             |
|----------------------------------|------------------------------------------|------------------------------|--------------------------------------------|
| 5                                | 400                                      | 2                            | TiO <sub>2</sub> , FeO                     |
| 5                                | 500                                      | 2                            | TiO <sub>2</sub> , FeO, FeTiO <sub>3</sub> |
| 5                                | 600                                      | 2                            | TiO <sub>2</sub> , FeO, FeTiO <sub>3</sub> |
| 5                                | 625                                      | 2                            | TiO <sub>2</sub> , FeO, FeTiO <sub>3</sub> |
| 5                                | 625                                      | 5                            | TiO <sub>2</sub> , FeO, FeTiO <sub>3</sub> |
| 5                                | 650                                      | 2                            | TiO <sub>2</sub> , FeO, FeTiO <sub>3</sub> |
| 5                                | 650                                      | 5                            | FeTiO <sub>3</sub>                         |

**Table S4.** Experimental and Calculated lattice parameters for the bulk structure of three iron titanium oxides.

| System                                           | <b>a (Å)</b> | <b>b (Å)</b> | <b>c (Å)</b> |
|--------------------------------------------------|--------------|--------------|--------------|
| <b>Fe<sub>2</sub>TiO<sub>5</sub></b>             |              |              |              |
| Expt. <sup>1</sup>                               | 3.739        | 9.779        | 9.978        |
| Calculated                                       | 3.750        | 9.850        | 10.04        |
| <b>Fe<sub>2</sub>TiO<sub>4</sub><sup>a</sup></b> |              |              |              |
| Expt. <sup>2</sup>                               | 8.534        |              |              |
| Calculated                                       | 8.496        |              |              |
| <b>FeTiO<sub>3</sub><sup>b</sup></b>             |              |              |              |
| Expt. <sup>3</sup>                               | 5.088        |              | 14.092       |
| Calculated                                       | 5.075        |              | 14.036       |

<sup>a</sup>: lattice constant  $a = b = c$

<sup>b</sup>: lattice constant  $a = b \neq c$

**Table S5.** The observed rate constants ( $k_{obs}$ ) and the reaction orders (n) for the reduction of three iron titanium oxides ( $\text{Fe}_2\text{TiO}_5$ ,  $\text{Fe}_2\text{TiO}_4$ , and  $\text{FeTiO}_3$ ) with  $\text{H}_2$  molecule at various reaction temperatures.

| Structure                 | Temperature ( $^{\circ}\text{C}$ ) | $k_{obs}$             | n    |
|---------------------------|------------------------------------|-----------------------|------|
| $\text{Fe}_2\text{TiO}_5$ | 800                                | $8.36 \times 10^{-3}$ | 0.71 |
|                           | 850                                | $1.09 \times 10^{-2}$ |      |
|                           | 900                                | $1.32 \times 10^{-2}$ |      |
|                           | 950                                | $1.59 \times 10^{-2}$ |      |
|                           | 1000                               | $1.84 \times 10^{-2}$ |      |
| $\text{Fe}_2\text{TiO}_4$ | 800                                | $6.16 \times 10^{-4}$ | 0.54 |
|                           | 850                                | $1.06 \times 10^{-3}$ |      |
|                           | 900                                | $1.58 \times 10^{-3}$ |      |
|                           | 950                                | $2.19 \times 10^{-3}$ |      |
|                           | 1000                               | $2.66 \times 10^{-3}$ |      |
| $\text{FeTiO}_3$          | 800                                | $3.03 \times 10^{-5}$ | 0.27 |
|                           | 850                                | $5.22 \times 10^{-5}$ |      |
|                           | 900                                | $1.03 \times 10^{-4}$ |      |
|                           | 950                                | $1.35 \times 10^{-4}$ |      |
|                           | 1000                               | $2.04 \times 10^{-4}$ |      |

**Table S6.** Calculated intermolecular distances (in Å) and imaginary Frequencies (IMF,  $\text{cm}^{-1}$ ) for three iron titanium oxides ( $\text{Fe}_2\text{TiO}_5$ ,  $\text{Fe}_2\text{TiO}_4$ , and  $\text{FeTiO}_3$ ) during the reduction mechanism.

| System                               | Surface |       |       |       | H <sub>2</sub> O |                  | IMF           |
|--------------------------------------|---------|-------|-------|-------|------------------|------------------|---------------|
|                                      | H-H     | Fe-H  | H-O   | Fe-O  | H-O <sub>1</sub> | H-O <sub>2</sub> |               |
| <b>Fe<sub>2</sub>TiO<sub>5</sub></b> |         |       |       |       |                  |                  |               |
| IS                                   | 0.797   | 0.173 | 2.121 | 1.885 |                  |                  |               |
| TS1                                  | 0.930   | 1.635 | 1.382 | 2.081 |                  |                  | <i>i</i> 831  |
| IM                                   | 1.991   | 1.490 | 0.977 | 2.114 |                  |                  |               |
| TS2                                  | 2.172   | 1.489 | 0.967 | 2.853 |                  |                  | <i>i</i> 1157 |
| FS                                   |         |       |       |       | 0.982            | 0.982            |               |
| <b>Fe<sub>2</sub>TiO<sub>4</sub></b> |         |       |       |       |                  |                  |               |
| IS                                   | 0.823   | 1.771 | 2.611 | 1.950 |                  |                  |               |
| TS1                                  | 1.004   | 1.695 | 1.335 | 2.137 |                  |                  | <i>i</i> 895  |
| IM                                   | 2.471   | 1.500 | 0.976 | 1.955 |                  |                  |               |
| TS2                                  | 1.182   | 1.775 | 1.428 | 2.783 |                  |                  | <i>i</i> 1382 |
| FS                                   |         |       |       |       | 0.979            | 0.985            |               |
| <b>FeTiO<sub>3</sub><sup>b</sup></b> |         |       |       |       |                  |                  |               |
| IS                                   | 0.754   | 2.696 | 2.921 | 2.046 |                  |                  |               |
| TS1                                  | 1.309   | 1.663 | 1.045 | 2.611 |                  |                  | <i>i</i> 768  |
| IM                                   | 2.864   | 1.762 | 0.977 | 2.221 |                  |                  |               |
| TS2                                  | 1.994   | 2.092 | 1.089 | 2.461 |                  |                  | <i>i</i> 1056 |
| FS                                   |         |       |       |       | 1.013            | 0.988            |               |

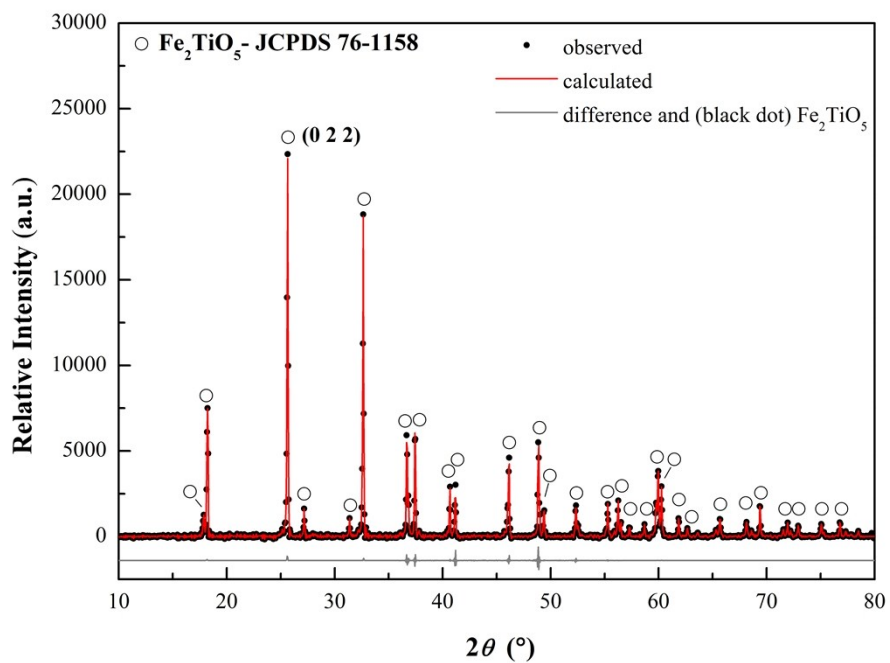

**Figure S1.** The XRD patterns for  $\text{Fe}_2\text{TiO}_5$ . The upper symbols illustrate the observed data (black dot), calculated pattern (red line) and the difference between them (grey line).



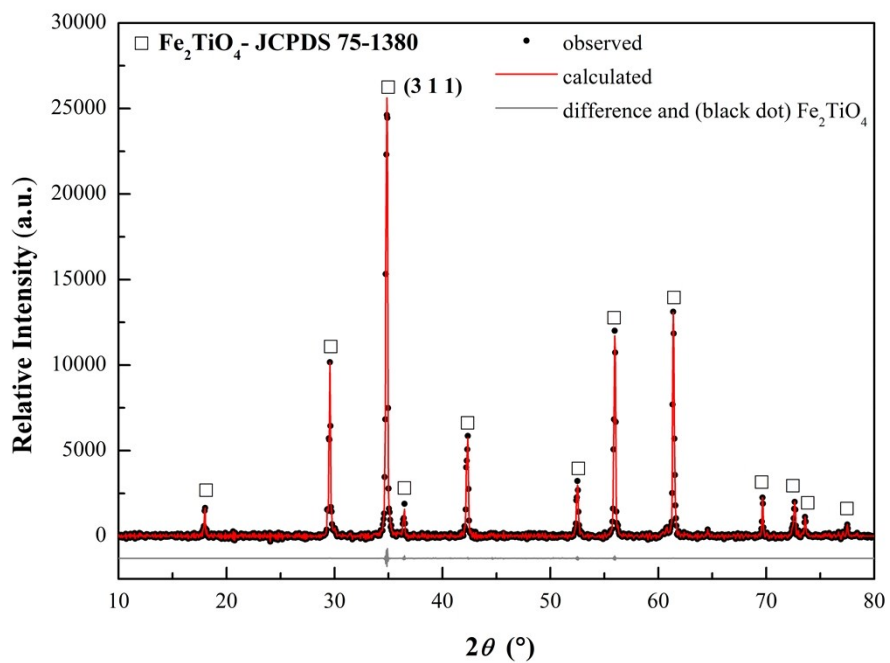

**Figure S2.** The XRD patterns for  $\text{Fe}_2\text{TiO}_4$ . The upper symbols illustrate the observed data (black dot), calculated pattern (red line) and the difference between them (grey line)

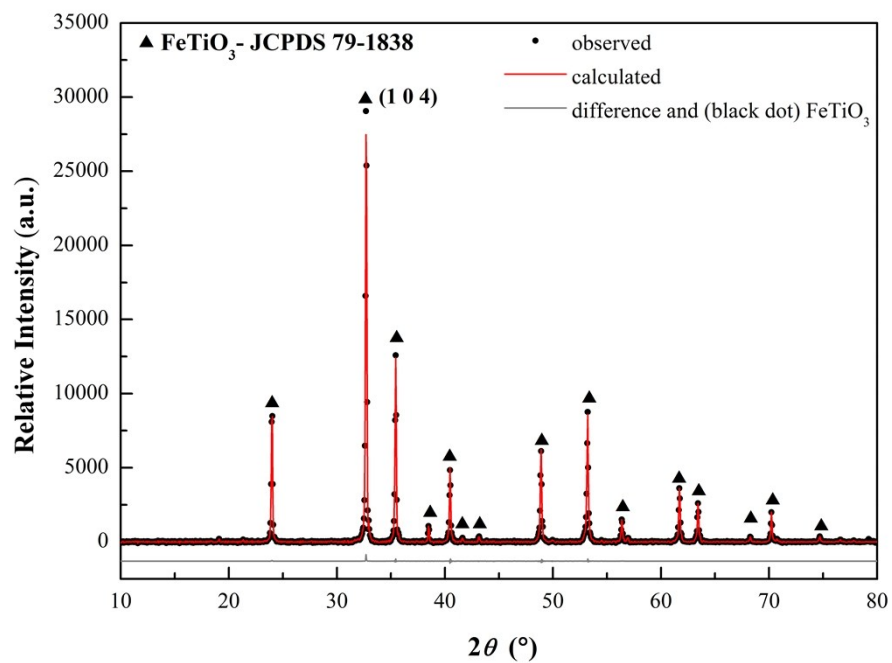

**Figure S3.** The XRD patterns for FeTiO<sub>3</sub>. The upper symbols illustrate the observed data (black dot), calculated pattern (red line) and the difference between them (grey line).

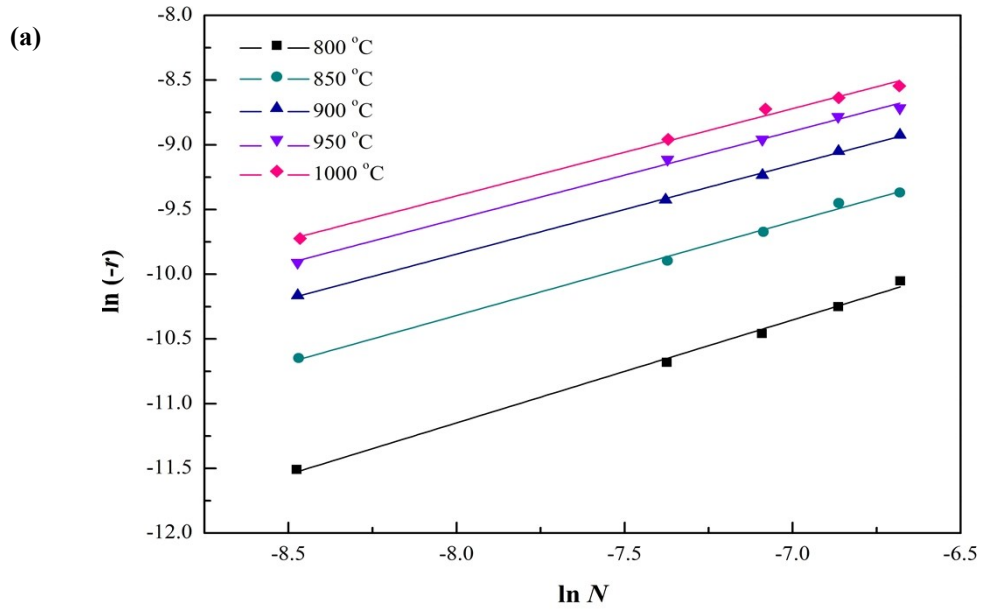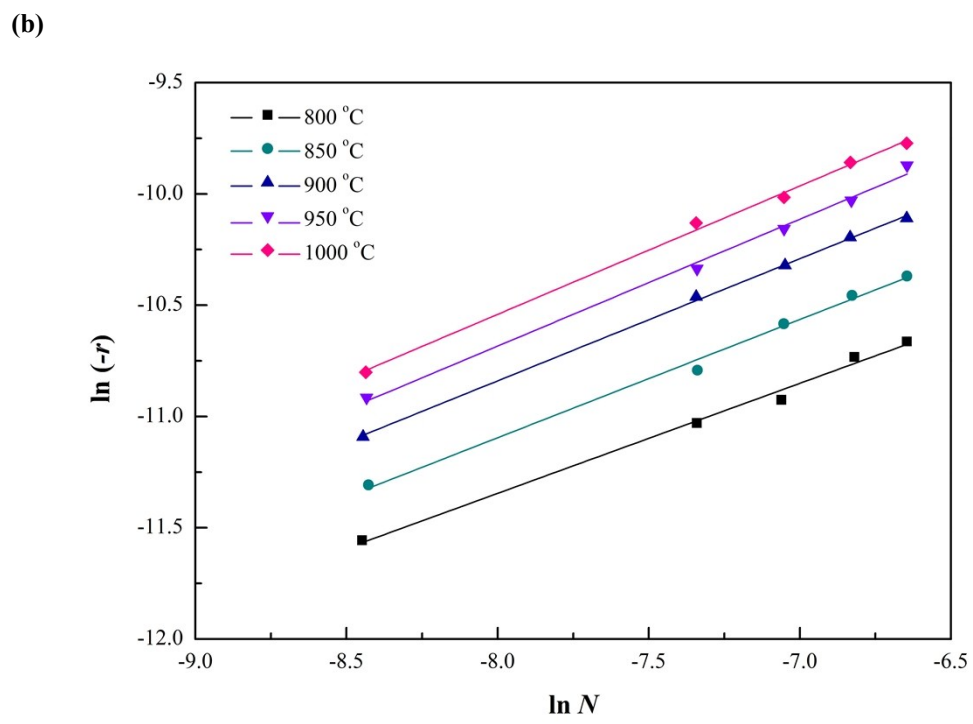

(c)

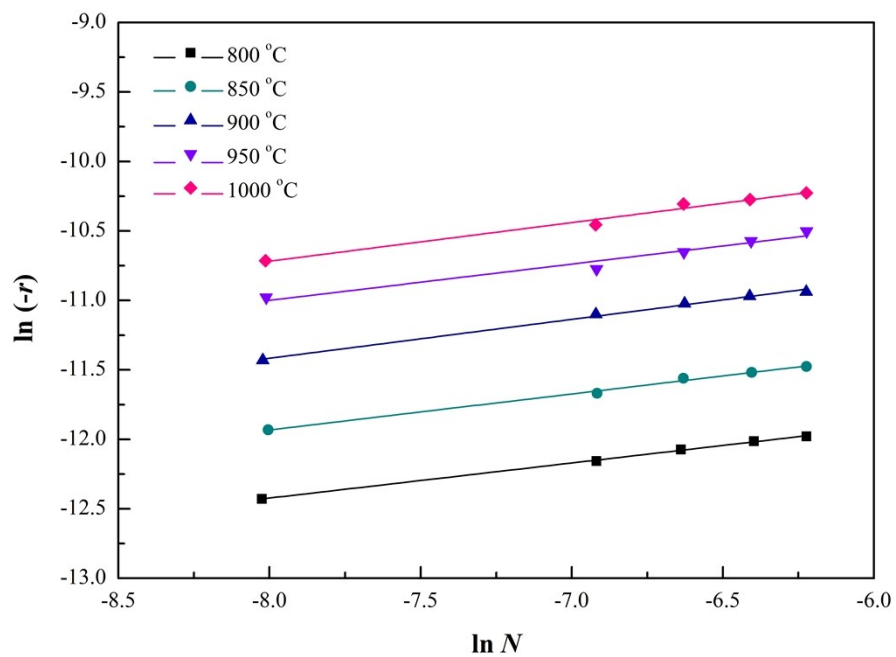

**Figure S4.** Reactivity curves by TGA from 800-1000 °C using 20.4 % of  $\text{H}_2$  as fuel. Fitting lines correspond to results predicted by the model using kinetic parameters from (a)  $\text{Fe}_2\text{TiO}_5$ , (b)  $\text{Fe}_2\text{TiO}_4$ , and (c)  $\text{FeTiO}_3$  reduction.

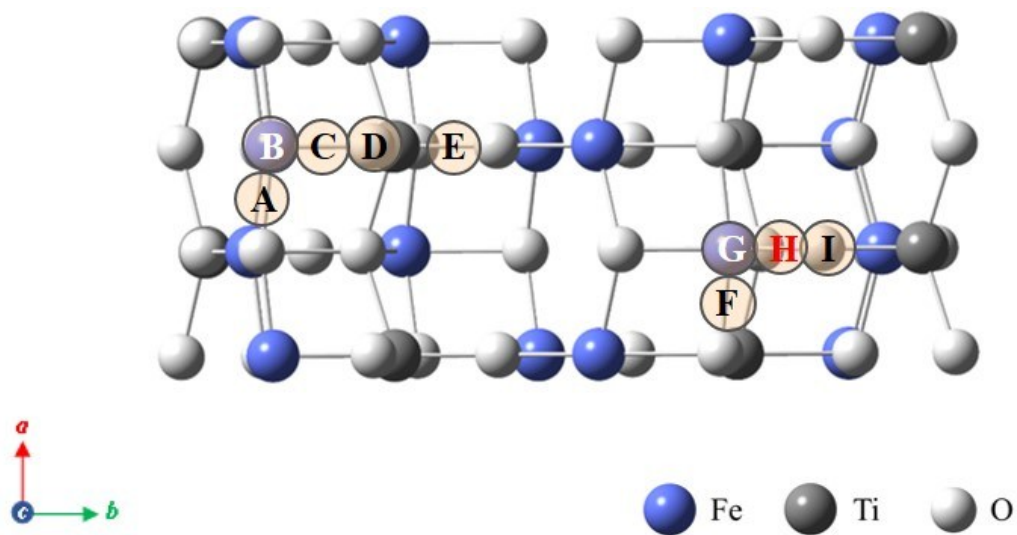

**Figure S5.** The considered different adsorption sites for the H<sub>2</sub> molecule on Fe<sub>2</sub>TiO<sub>5</sub> (0 2 2) surfaces.

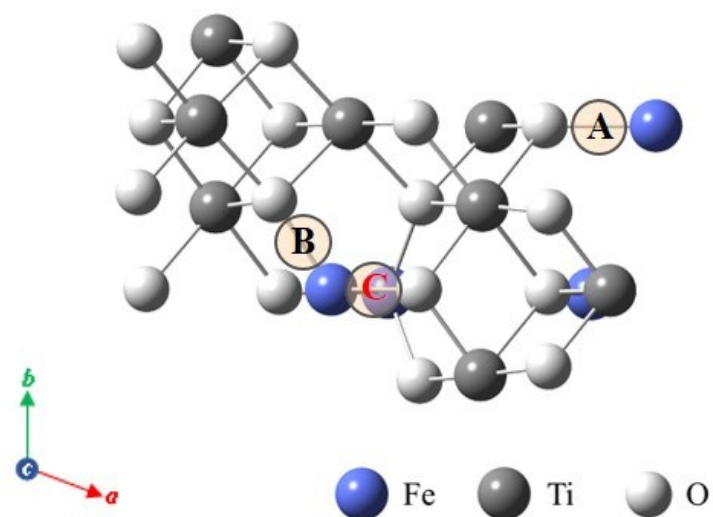

**Figure S6.** The considered different adsorption sites for the H<sub>2</sub> molecule on Fe<sub>2</sub>TiO<sub>4</sub> (3 1 1) surface

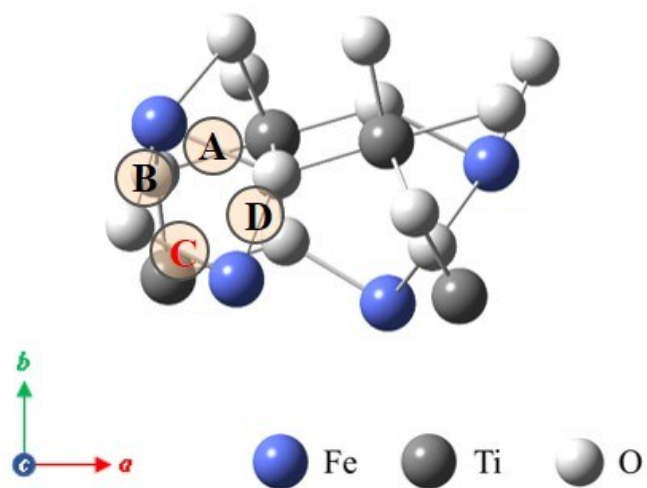

**Figure S7.** The considered different adsorption sites for the H<sub>2</sub> molecule on FeTiO<sub>3</sub> (1 0 4) surface

(a)

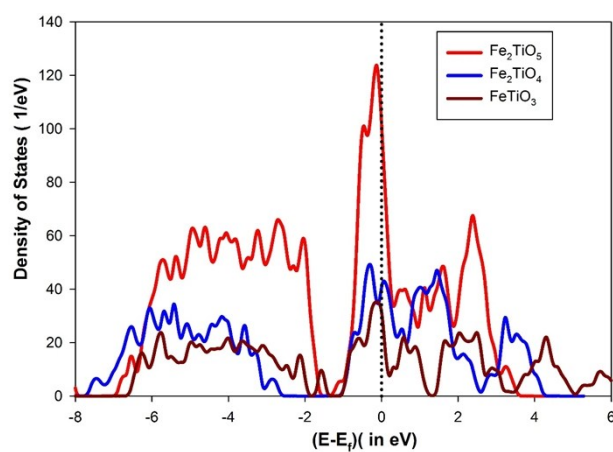

(b)

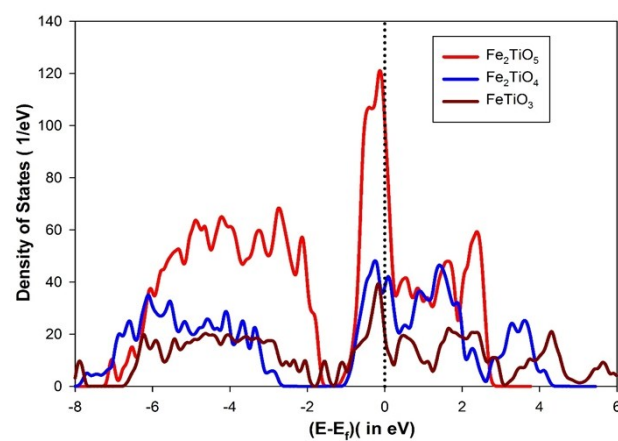

(c)

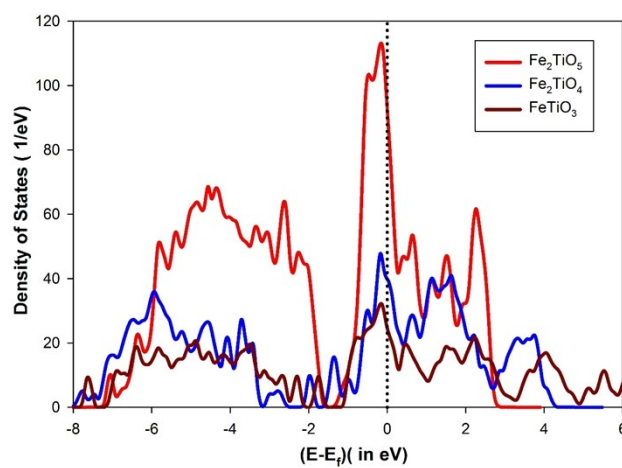

**Figure S8.** Total density of states of H<sub>2</sub> adsorbed on the three oxygen carriers ((a) when H<sub>2</sub> adsorbed on the surfaces in IS, (b) when adsorbed H<sub>2</sub> dissociates into H atoms in IM and (c) when H<sub>2</sub>O formed on the surfaces in FS.)



(a)

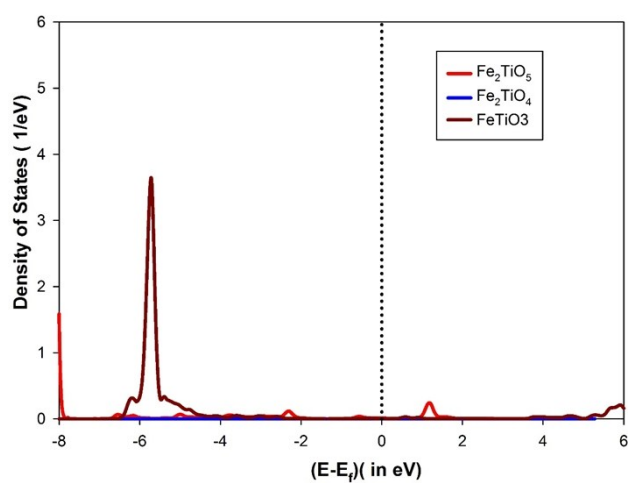

(b)

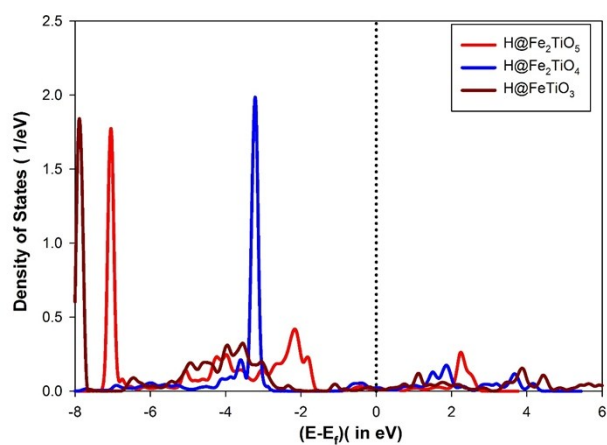

(c)

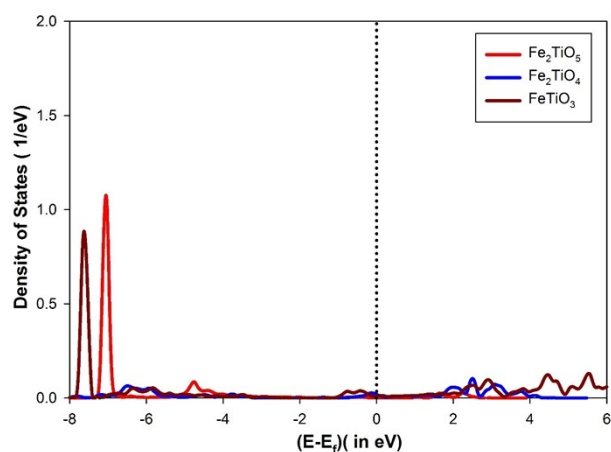

**Figure S9.** Partial density of states of H<sub>2</sub> after adsorbed on the three oxygen carriers ((a) when H<sub>2</sub> adsorbed on the surfaces in IS, (b) when adsorbed H<sub>2</sub> dissociates into H atoms in IM and (c) when H<sub>2</sub>O formed on the surfaces in FS.)

## References:

1. P. Tiedemann and H. Müller-Buschbaum, *Zeitschrift für anorganische und allgemeine Chemie*, 1982, **494**, 98-102.
2. B. A. Wechsler, D. H. Lindsley and C. T. Prewitt *American Mineralogist*, 1984, **69**, 754.
3. K. N. Raymond and H. R. Wenk, *Contributions to Mineralogy and Petrology*, **30**, 135-140.
